# Supplementary material for: Racial/Ethnic Disparities in Physical Function Before and After Total Knee Arthroplasty Among Women in the United States
Source: PubMed Central journal article supplement (PMC7229524; doi:10.1001/jamanetworkopen.2020.4937), 2020-05-15
Supplement: jamanetwopen-3-e204937-s001.pdf [file jamanetwopen-3-e204937-s001.pdf]

## Supplementary Online Content

Cavanaugh AM, Rauh MJ, Thompson CA, et al. Racial/ethnic disparities in physical function before and after total knee arthroplasty among women in the United States. *JAMA Netw Open*. 2020;3(5):e204937. doi:10.1001/jamanetworkopen.2020.4937

**eTable 1.** Mean Differences in Physical Function Scores at Selected Time Points and Generalized Estimating Equation Parameter Estimates for Physical Function Scores of Women Post-TKA From the Women's Health Initiative, 1993-2017, n=7,987

**eTable 2.** Comparison of Demographic and Health Characteristics of Participants With Complete and Missing Physical Function Data

**eFigure 1.** Probability of Experiencing Difficulty With Activity in the Decade Prior to TKA, by Race/Ethnicity

**eFigure 2.** Preoperative Physical Function for the Decade Prior to TKA by Race/Ethnicity, With Stratification by Socioeconomic Status

This supplementary material has been provided by the authors to give readers additional information about their work.

**eTable 1.** Mean Differences in Physical Function Scores at Selected Time Points and Generalized Estimating Equation Parameter Estimates for Physical Function Scores of Women Post-TKA From the Women’s Health Initiative, 1993-2017, n=7,987<sup>a</sup>

|                           | Physical Function Scores |                 |         |                          |                 |         |                                       |                |         |
|---------------------------|--------------------------|-----------------|---------|--------------------------|-----------------|---------|---------------------------------------|----------------|---------|
|                           | Unadjusted               |                 |         | Adjusted for age         |                 |         | Adjusted for age and pre-TKA function |                |         |
|                           | Mean difference (95% CI) |                 |         | Mean Difference (95% CI) |                 |         | Mean Difference (95% CI)              |                |         |
| 1 year from TKA           |                          |                 |         |                          |                 |         |                                       |                |         |
| Black                     | -6.3                     | (-10.8 to -3.4) |         | -7.8                     | (-10.8 to -4.9) |         | -3.0                                  | (-5.3 to -0.7) |         |
| Hispanic                  | -1.8                     | (-7.4 to 3.8)   |         | -2.6                     | (-8.0 to 2.7)   |         | -1.7                                  | (-6.0 to 2.6)  |         |
| White                     | 0                        | (ref)           |         | 0                        | (ref)           |         | 0                                     | (ref)          |         |
| 2 years from TKA          |                          |                 |         |                          |                 |         |                                       |                |         |
| Black                     | -5.8                     | (-8.5 to -3.2)  |         | -7.3                     | (-10.0 to -4.7) |         | -2.5                                  | (-4.5 to -0.4) |         |
| Hispanic                  | -1.4                     | (-6.6 to 3.7)   |         | -2.3                     | (-7.3 to 2.6)   |         | -1.3                                  | (-5.2 to 2.6)  |         |
| White                     | 0                        | (ref)           |         | 0                        | (ref)           |         | 0                                     | (ref)          |         |
| 5 years from TKA          |                          |                 |         |                          |                 |         |                                       |                |         |
| Black                     | -4.3                     | (-6.7 to -1.9)  |         | -5.8                     | (-8.2 to -3.5)  |         | -0.9                                  | (-2.7 to 0.9)  |         |
| Hispanic                  | -0.3                     | (-5.2 to 4.6)   |         | -1.3                     | (-6.0 to 3.3)   |         | -0.2                                  | (-3.9 to 3.6)  |         |
| White                     | 0                        | (ref)           |         | 0                        | (ref)           |         | 0                                     | (ref)          |         |
| 10 years from TKA         |                          |                 |         |                          |                 |         |                                       |                |         |
| Black                     | -1.9                     | (-5.8 to 2.0)   |         | -3.3                     | (-7.1 to 0.4)   |         | 1.7                                   | (-1.6 to 4.9)  |         |
| Hispanic                  | 1.6                      | (-5.6 to 8.8)   |         | 0.3                      | (-6.7 to 7.4)   |         | 1.7                                   | (-4.8 to 8.2)  |         |
| White                     | 0                        | (ref)           |         | 0                        | (ref)           |         | 0                                     | (ref)          |         |
|                           | Unadjusted               |                 |         | Adjusted for age         |                 |         | Adjusted for age and pre-TKA function |                |         |
|                           | Estimate                 | Standard error  | p-value | Estimate                 | Standard error  | p-value | Estimate                              | Standard error | p-value |
| Intercept                 | 61.68                    | 0.68            | <.001   | 136.32                   | 3.55            | <.001   | 66.22                                 | 3.04           | <.001   |
| Race/Ethnicity            |                          |                 |         |                          |                 |         |                                       |                |         |
| Black                     | -6.80                    | 1.67            | <.001   | -8.32                    | 1.68            | <.001   | -3.49                                 | 1.34           | <.01    |
| Hispanic                  | -2.21                    | 3.12            | .48     | -2.99                    | 3.00            | .32     | -2.05                                 | 2.46           | .41     |
| White                     | 0                        | (ref)           |         | 0                        | (ref)           |         | 0                                     | (ref)          |         |
| Time from TKA (years)     | 0.38                     | 0.38            | .31     | 0.29                     | 0.37            | .43     | 0.31                                  | 0.37           | .38     |
| Quadratic time            | -0.25                    | 0.07            | <.001   | -0.25                    | 0.07            | <.001   | -0.25                                 | 0.07           | <.001   |
| Cubic time                | 0.01                     | 0.00            | .02     | 0.01                     | 0.00            | .02     | 0.01                                  | 0.00           | .02     |
| Interaction with time     |                          |                 |         |                          |                 |         |                                       |                |         |
| Black                     | 0.49                     | 0.27            | .07     | 0.50                     | 0.27            | .06     | 0.52                                  | 0.24           | .03     |
| Hispanic                  | 0.38                     | 0.46            | .41     | 0.33                     | 0.46            | .47     | 0.37                                  | 0.44           | .40     |
| White                     | 0                        | (ref)           |         | 0                        | (ref)           |         | 0                                     | (ref)          |         |
| Age                       | -                        | -               | -       | -1.00                    | 0.05            | <.001   | -0.78                                 | 0.04           | <.001   |
| Pre-TKA Physical Function | -                        | -               | -       | -                        | -               | -       | 0.86                                  | 0.01           | <.001   |

<sup>a</sup>Physical function scores correspond to RAND-36 physical function scale  
Abbreviations: TKA, total knee arthroplasty; CI, confidence interval

**eTable 2.** Comparison of Demographic and Health Characteristics of Participants With Complete and Missing Physical Function Data

| Characteristic                                        | Women with Post-TKA PF scores <sup>a</sup> | Women without Post-TKA PF scores <sup>b</sup> | p-value |
|-------------------------------------------------------|--------------------------------------------|-----------------------------------------------|---------|
| Race                                                  |                                            |                                               | <.001   |
| Black/African American                                | 410 (5.1)                                  | 212 (9.0)                                     |         |
| Hispanic/Latina                                       | 97 (1.2)                                   | 78 (3.3)                                      |         |
| White                                                 | 7,465 (93.6)                               | 2,063 (87.7)                                  |         |
| Age at surgery, <i>mean (SD)</i>                      | 74 (70-78)                                 | 75 (71-79)                                    | <.001   |
| Region, <i>n (%)</i>                                  |                                            |                                               | <.001   |
| Midwest                                               | 1,780 (22.3)                               | 425 (18.1)                                    |         |
| Northeast                                             | 2,292 (28.8)                               | 804 (34.2)                                    |         |
| South                                                 | 2,521 (31.6)                               | 702 (29.8)                                    |         |
| West                                                  | 1,379 (17.3)                               | 422 (17.9)                                    |         |
| Marital Status, <i>n (% yes)</i>                      | 5,295 (66.4)                               | 1,482 (63.1)                                  | <.01    |
| Live Alone, <i>n (% yes)</i>                          | 2,190 (29.6)                               | 674 (31.8)                                    | .05     |
| BMI, <i>n (%)</i>                                     |                                            |                                               | <.001   |
| Underweight/Normal weight: <25 kg/m <sup>2</sup>      | 1,486 (18.8)                               | 379 (16.3)                                    |         |
| Overweight: 25-<30 kg/m <sup>2</sup>                  | 2,778 (35.1)                               | 760 (32.7)                                    |         |
| Obese I: 30- <35 kg/m <sup>2</sup>                    | 2,099 (26.6)                               | 630 (27.1)                                    |         |
| Obese II/III: ≥35 kg/m <sup>2</sup>                   | 1,544 (19.5)                               | 555 (23.9)                                    |         |
| Multimorbidity Score (CMS-HCC), <i>median (IQR)</i>   | 0.62 (0.43-0.92)                           | 0.67 (0.43-1.01)                              | <.001   |
| Moderate-to-Strenuous Physical Activity, <i>n (%)</i> |                                            |                                               | <.001   |
| None                                                  | 3,084 (38.7)                               | 1,087 (46.5)                                  |         |
| 1-<150 minutes/week                                   | 2,675 (33.6)                               | 723 (31.0)                                    |         |
| >150 minutes/week                                     | 2,210 (27.7)                               | 525 (22.5)                                    |         |
| Depressive Symptoms, <i>n (% yes)</i>                 | 697 (8.8)                                  | 309 (13.3)                                    | <.001   |
| Educational Level, <i>n (%)</i>                       |                                            |                                               | <.001   |
| Less than high school                                 | 212 (2.7)                                  | 116 (5.0)                                     |         |
| High school                                           | 1,310 (16.5)                               | 508 (21.7)                                    |         |
| Some college                                          | 2,928 (36.9)                               | 936 (39.9)                                    |         |
| College graduate                                      | 3,490 (43.9)                               | 785 (33.5)                                    |         |
| Family Income, <i>n (%)</i>                           |                                            |                                               | <.001   |
| <\$20,000                                             | 730 (9.7)                                  | 375 (17.3)                                    |         |
| \$20,000-<\$50,000                                    | 34,448 (45.7)                              | 1,019 (47.0)                                  |         |
| ≥\$50,000                                             | 3,370 (44.7)                               | 775 (35.7)                                    |         |
| Neighborhood SES, <i>mean (SD)</i>                    | 77.8 (73.0-81.7)                           | 77.2 (72.1-81.1)                              | <.001   |

<sup>a</sup> Included in physical function generalized estimating equation models.

<sup>b</sup> Excluded from physical function generalized estimating equation models due to incomplete data

eFigure1. Probability of experiencing difficulty with activity in the decade prior to TKA, by race ethnicity

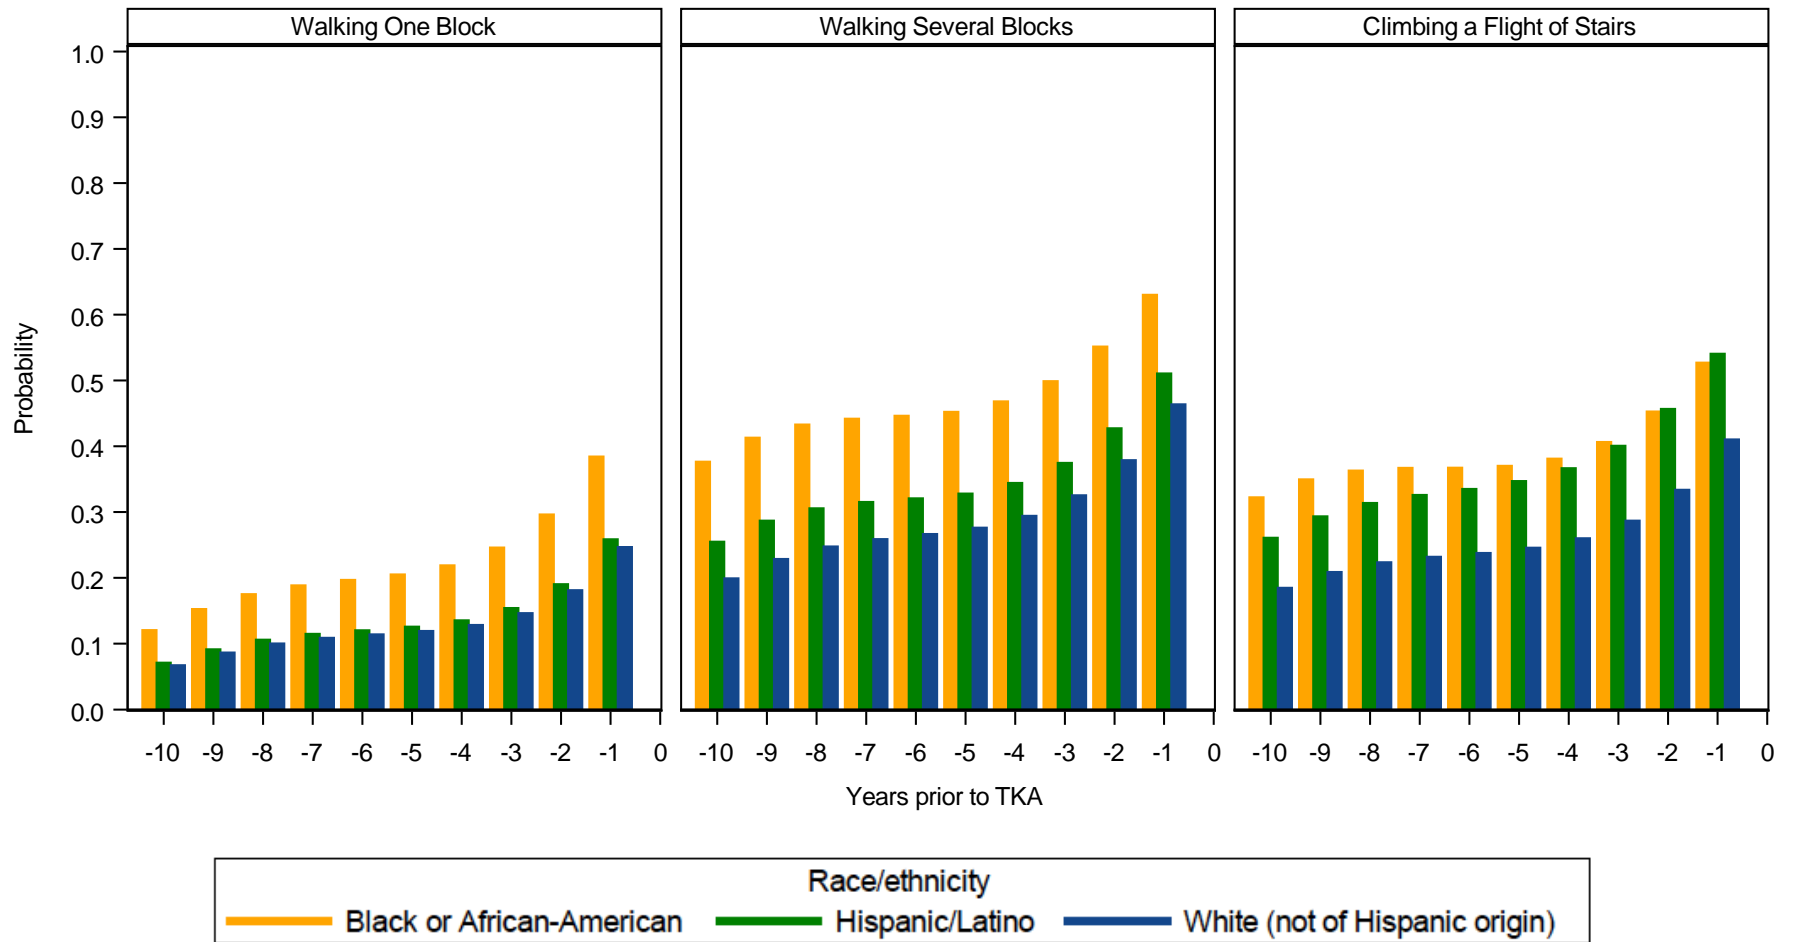

Predicted probability determined through generalized estimating equation models fit for age 74 at time of TKA

eFigure 2. Pre-operative physical function for the decade prior to TKA by race/ethnicity, with stratification by socioeconomic status.

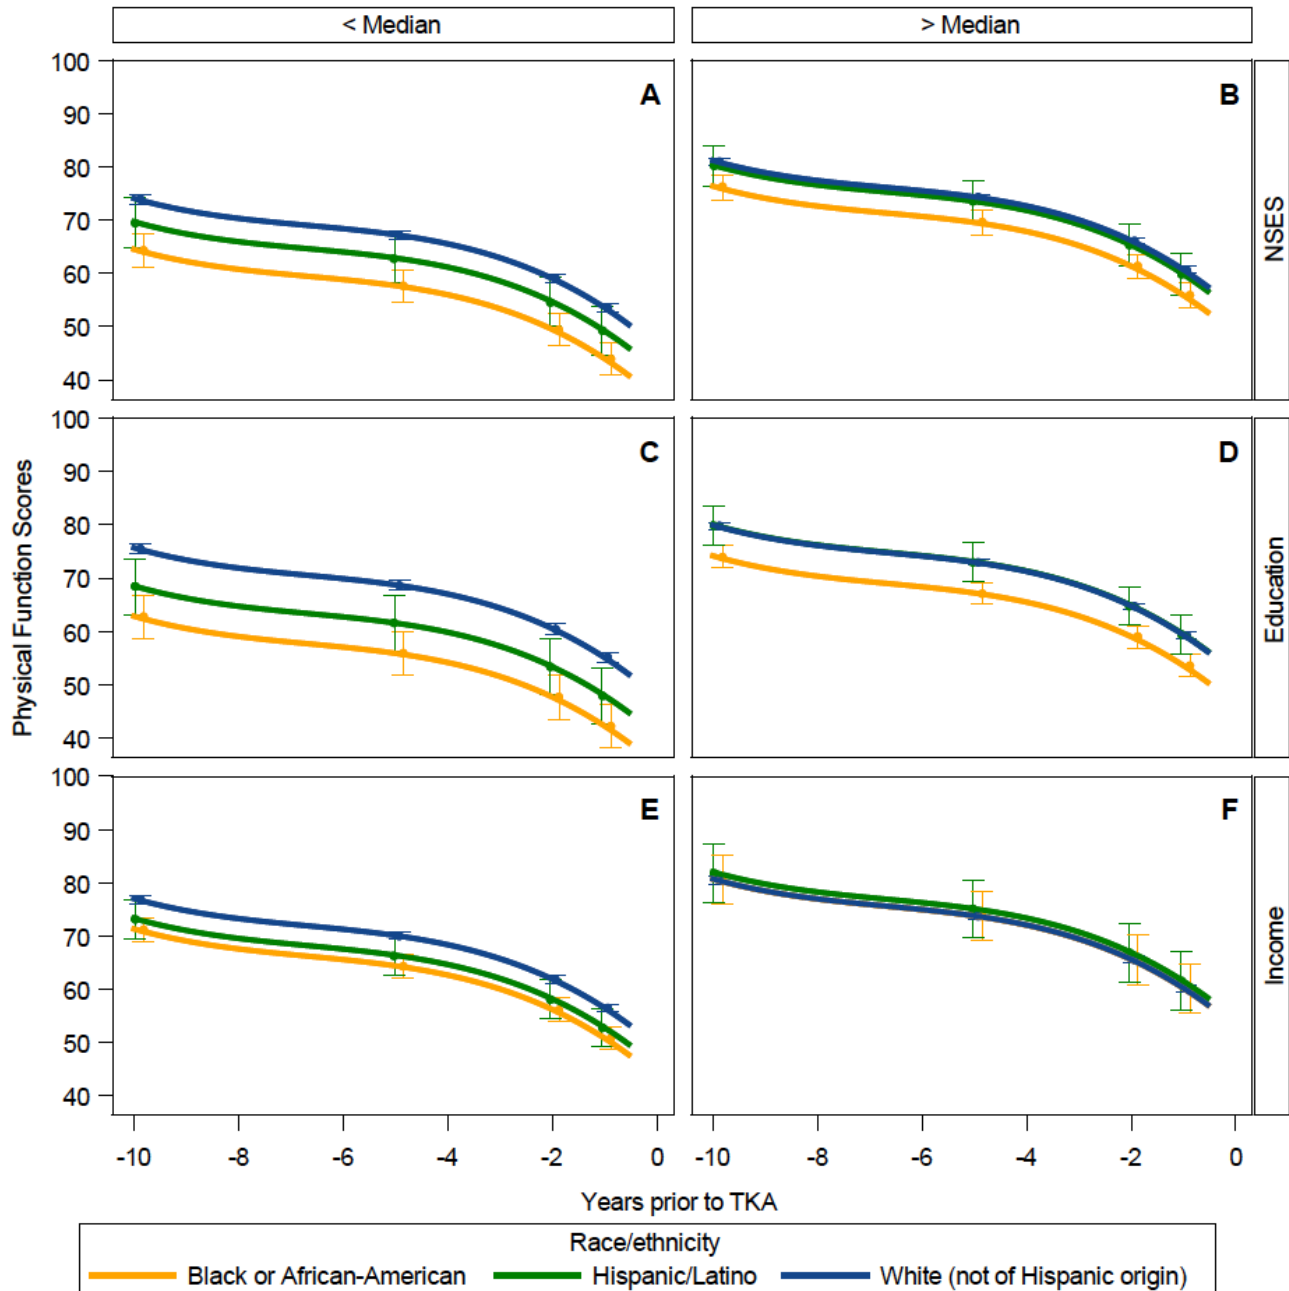

Values are predicted marginal means from GEE models fit for age 74 at time of TKA.

A) education of high school completion/GED or lesser attainment B) educational attainment of some college

C) annual family income < \$35,000 D) annual family income \$35,000 or greater

E) neighborhood socioeconomic status (NSES) <77.68 F) NSES 77.68 or greater
